# Supplementary material for: Systems Pharmacological Approach of Pulsatillae Radix on Treating Crohn's Disease
Source: Evid Based Complement Alternat Med. 2017 Jun 1;2017:4198035. doi: 10.1155/2017/4198035 (PMC5474285; doi:10.1155/2017/4198035)
Supplement: Supplementary file 1 — Supplementary Table S1 showed the ADME profiles of 57 compounds in PR, and supplementary Table S2 demonstrated the mRNA expression profiles of 179 of 182 genes. [file 4198035.f1.xlsx]

## Sheet: table s1
Mol ID	Molecule Name	MW	AlogP	Hdon	Hacc	OB (%)	Caco-2	BBB	DL	FASA-	HL
MOL001974	[(2S,3R,4S,5S,6R)-3,4,5-trihydroxy-6-[[(2R,3R,4S,5S,6R)-3,4,5-trihydroxy-6-(hydroxymethyl)tetrahydropyran-2-yl]oxymethyl]tetrahydropyran-2-yl] (4aS,6aR,6aS,6bR,8aR,9R,10S,12aR,14bS)-10-[(2S,3R,4S,5S)-4,5-dihydroxy-3-[(2S,3R,4R,5R,6S)-3,4,5-trihydroxy-6-me	1075.39	-0.41	13	22	1.92	-3.73	-5.29	0.03	0.22
MOL001995	2,5-Furandione	98.06	0.25	0	3	46.75	0.29	0.1	0.01	0.41	12.12
MOL001983	3beta,23-Dihydroxy-lup-20(29)-ene-28-O-alpha-L-rhamnopyranosyl-(1-4)-beta-D-glucopyranosyl(1-6)-beta-D-glucopyranoside	901.22	0.41	11	17	10.39	-2.68	-3.72	0.07	0.24
MOL001984	3beta,23-Dihydroxy-lup-20(29)-ene-28-O-alpha-L-rhamnopyranosyl-(1-4)-beta-D-glucopyranosyl(1-6)-beta-D-glucopyranoside_qt	430.74	4.76	3	3	37.59	0.45	-0.24	0.79	0.26	6.7
MOL001994	3-Methylcoumarin	160.18	2.35	0	2	19.66	1.27	1.26	0.05	0.44
MOL001958	3-O-alpha-L-Arabinopyranosyl-3 beta,23-dihydroxy-lup-20(29)-en-28-oic acid	604.91	4.19	5	8	5.84	-0.79	-1.69	0.42	0.25
MOL001959	3-O-alpha-L-Arabinopyranosyl-3 beta,23-dihydroxy-lup-20(29)-en-28-oic acid_qt	472.78	5.43	3	4	26.21	0.18	-0.49	0.77	0.25
MOL001997	5,6,7-Trimethoxycoumarin	236.24	1.85	0	5	32.54	0.94	0.54	0.12	0.17	0.74
MOL001998	5alpha,9alpha-Dihydroxymatrine	280.41	-0.3	2	5	29.94	-0.13	-0.52	0.32	0.19
MOL001988	AIDS045703	414.44	2.94	1	8	21.37	0.55	-0.17	0.87	0.2
MOL001976	androstane-3,11,17-triol	308.51	2.32	3	3	13.19	-0.04	-0.63	0.38	0.21
MOL001883	anemonin	192.18	0.83	0	4	13.13	0.51	0.26	0.1	0.37
MOL001957	Anemosapogenin	472.78	5.43	3	4	17.87	0.07	-0.64	0.77	0.26
MOL001960	Anemosapogenin	472.78	5.43	3	4	12.75	0.16	-0.57	0.77	0.25
MOL001989	Anemoside A	733.1	4.54	7	10	8.36	-1.52	-2.61	0.14	0.24
MOL001961	Anemoside A3	751.07	3.34	7	12	15.46	-1.6	-2.24	0.15	0.26
MOL001990	Anemoside B	1221.55	-1.17	15	26	6.86	-4.76	-6.06	0.01	0.26
MOL001991	Anemoside B_qt	472.78	5.43	3	4	19.26	0.08	-0.57	0.77	0.25
MOL001963	Anemoside B4	1221.55	-1.17	15	26	6.79	-4.8	-5.55	0.01	0.26
MOL001962	Anemoside B4_qt	472.78	5.43	3	4	24.54	0.12	-0.53	0.77	0.26
MOL001978	Aureusidin	286.25	2.07	4	6	53.42	0.07	-0.53	0.24	0.44	21.02
MOL000358	beta-sitosterol	414.79	8.08	1	1	36.91	1.32	0.99	0.75	0.23	5.36
MOL001996	Betulonic acid	454.76	6.48	1	3	16.83	0.65	0.14	0.78	0.29
MOL000458	campesterol	400.76	7.97	1	1	5.57	1.6	1.41	0.72	0.22
MOL001964	Cauloside A	604.91	4.1	5	8	6.84	-0.82	-1.48	0.4	0.24
MOL001977	cernuoside	448.41	0.16	7	11	2.69	-1.51	-2.18	0.79	0.39
MOL001965	Dauricine (8CI)	624.84	7.22	1	8	23.65	0.9	0.03	0.37	0.22
MOL001982	disacoside B_qt	472.78	5.33	3	4	15.83	0.17	-0.5	0.74	0.23
MOL000298	ergosterol	396.72	6.93	1	1	14.29	1.47	1.04	0.72	0
MOL002000	Fraxinol	222.21	1.6	1	5	24.19	0.7	0.22	0.1	0.22
MOL001966	Hederagenin 3-O-arabinoside	811.08	1.89	9	15	49.12	-2.15	-2.94	0.15	0.26	6.51
MOL001967	Hederagenin-28-O-beta-D-glucuronopyranosyl-(1-4)-beta-D-glucopyranoside	751.07	3.34	7	12	20.07	-1.68	-2.17	0.15	0.22
MOL001968	Hederagenin-28-O-beta-D-glucuronopyranosyl-(1-4)-beta-D-glucopyranoside_qt	472.78	5.33	3	4	10.69	0.23	-0.33	0.74	0.24
MOL000551	Hederagenol	472.78	5.33	3	4	22.42	0.1	-0.51	0.74	0.23
MOL001980	Helixin	751.07	3.24	7	12	9.63	-1.81	-2.46	0.14	0.27
MOL000354	isorhamnetin	316.28	1.76	4	7	49.6	0.31	-0.54	0.31	0.32	14.34
MOL001979	LAN	426.8	8.12	1	1	42.12	1.52	1.18	0.75	0.23	5.84
MOL000663	lignoceric acid	368.72	10.02	1	2	14.9	1.24	1.01	0.33	0.17
MOL000211	Mairin	456.78	6.52	2	3	55.38	0.73	0.22	0.78	0.26	8.87
MOL000263	oleanolic acid	456.78	6.42	2	3	29.02	0.59	0.07	0.76	0.25
MOL002001	Oleanolic acid deriv.	498.82	6.8	1	4	14.24	0.65	0.13	0.7	0.24
MOL001842	Pinoresinol	358.42	2.13	2	6	4.25	0.52	-0.25	0.52	0
MOL001969	Pulchinenoside A	1217.61	0.59	14	24	6.69	-3.62	-4.63	0.01	0.26
MOL001900	Pulchinenoside A_qt	472.78	5.43	3	4	16.91	0.12	-0.58	0.77	0.25
MOL001970	Pulchinenoside C	943.26	0.82	11	18	1.75	-3.27	-4.19	0.06	0.24
MOL001971	Pulchinenoside C_qt	470.81	6.98	2	3	37.79	0.64	0.09	0.76	0.27	8.4
MOL001972	Pulegone	152.26	2.75	0	1	51.6	1.39	1.74	0.03	0.26	11.19
MOL001981	pulsatilla saponin D	913.23	1.49	10	17	2.85	-2.64	-3.43	0.08	0.24
MOL001999	scoparone	206.21	1.87	0	4	74.75	0.85	0.46	0.09	0.23	0.73
MOL000357	Sitogluside	576.95	6.34	4	6	20.63	-0.14	-0.93	0.62	0.23
MOL001973	Sitosteryl acetate	456.83	8.46	0	2	40.39	1.39	1.11	0.85	0.22	6.34
MOL000449	Stigmasterol	412.77	7.64	1	1	43.83	1.44	1	0.76	0.22	5.57
MOL001993	TRICOSANOIC ACID	354.69	9.56	1	2	15.29	1.18	0.94	0.3	0.18
MOL000511	ursolic acid	456.78	6.47	2	3	16.77	0.67	0.07	0.75	0.26
MOL001985	ZINC01615307	414.44	2.94	1	8	56.38	0.53	-0.05	0.87	0.19	10.29
MOL001987	β-sitosterol	546.57	1.55	3	12	33.94	-0.44	-1.37	0.7	0.18	13.56
MOL001986	β-sitosterol	386.73	7.63	1	1	5.84	1.42	1.1	0.71	0.2

## Sheet: table s2
Samples	721_B_lymphoblasts.1	721_B_lymphoblasts.2	Adipocyte.1	Adipocyte.2	AdrenalCortex.1	AdrenalCortex.2	Adrenalgland.1	Adrenalgland.2	Amygdala.1	Amygdala.2	Appendix.1	Appendix.2	AtrioventricularNode.1	AtrioventricularNode.2	BDCA4+_DentriticCells.1	BDCA4+_DentriticCells.2	Bonemarrow.1	Bonemarrow.2	BronchialEpithelialCells.1	BronchialEpithelialCells.2	CD105+_Endothelial.1	CD105+_Endothelial.2	CD14+_Monocytes.1	CD14+_Monocytes.2	CD19+_BCells(neg._sel.).1	CD19+_BCells(neg._sel.).2	CD33+_Myeloid.1	CD33+_Myeloid.2	CD34+.1	CD34+.2	CD4+_Tcells.1	CD4+_Tcells.2	CD56+_NKCells.1	CD56+_NKCells.2	CD71+_EarlyErythroid.1	CD71+_EarlyErythroid.2	CD8+_Tcells.1	CD8+_Tcells.2	CardiacMyocytes.1	CardiacMyocytes.2	Caudatenucleus.1	Caudatenucleus.2	Cerebellum.1	Cerebellum.2	CerebellumPeduncles.1	CerebellumPeduncles.2	CiliaryGanglion.1	CiliaryGanglion.2	CingulateCortex.1
ABCC2	7	7.1	13.5	8.9	8	6.4	5.1	5.4	4.3	8.2	6	7	4.9	6	6.5	5.9	5.2	7.5	5.8	6.2	6.8	5	6.6	6.3	5.8	7	7.5	7.4	6.9	8	5.4	7	6.5	6.7	6.3	5.3	5.7	5.1	6.5	10	5	6	10.1	5.9	6.3	8	4.3	5.3	7.3
ACE	6.9	6.8	6.5	8.1	7.4	6	5.1	5.6	4.3	8.1	5.6	7.1	4.6	5.5	5.7	6.7	5.1	7.5	5.8	6.2	6.3	5.2	6.6	6.5	5.6	6.6	7.9	7.4	6.5	8	5.8	6.8	7.5	6.8	6	5.2	5.2	5.3	6.5	14.8	5.2	5.9	5.4	4.7	5.9	13.4	4.6	6.8	7.4
ACHE	4.8	5.3	52	46.9	5	3.9	3.6	3.8	12.4	23.3	3.9	4.7	3.1	3.6	4.1	4.5	3.5	5.1	4	4.4	4.9	3.9	4.5	4.6	4.3	4.7	5.5	5.7	5.1	5.6	4.3	5	5.4	5	95.4	51.8	3.9	4.1	4.6	6.6	9.3	8.4	16.4	6.9	20.7	10	2.8	3.2	5.1
ACP1	258.4	288.6	12.9	11.5	15.4	11.9	8.9	11.3	9.7	18.1	9.9	13.6	9	10.4	61.9	29.1	14.8	18.9	34.6	84.3	70.8	40.1	33.4	93.8	27.4	55	20.1	42.8	96.1	44.5	20.8	37.1	73.6	53.8	318.4	521.9	44.4	23.1	97.9	20.3	10.7	12.6	9.5	7.8	12.8	16.8	8.4	9.8	12.8
ADH1C	9.3	9.9	12	23.4	16.4	14.8	9.6	11	6.7	13	11.1	65.5	12.5	30.4	8.7	9.4	10	19.4	10.2	10.9	12.5	9.7	11.4	11.3	9.1	11.4	13.5	10.4	9.1	14.1	10.6	11.7	12.4	11.5	11.4	10	8.1	8	15.5	33.7	9.2	10.7	9.7	8.5	11.1	18	11.1	15.8	13.5
ADRA1A	13.5	13.3	15.1	13.4	18.7	22.8	12.4	13.4	8.9	19.3	14.8	19.4	17.5	21.7	8.1	14.3	22.8	20.9	13.1	14	12.9	11.6	13.9	11.3	13.5	14.6	13.6	13.6	13.1	17	11.2	12.4	13.1	14.2	14.5	12.5	8.7	11.2	15.1	27.5	19.3	14.1	16.3	13.4	14.5	19.4	15.3	17.3	28.5
ADRA1B	3.7	3.6	3	2.7	3.3	2.6	2.3	2.5	2.1	4	2.6	3.1	2	2.3	3.1	3.3	2.3	3.3	2.7	3	3.2	2.6	3.1	3.1	2.9	3.3	3.7	3.7	3.5	3.8	2.9	3.4	3.6	3.4	2.9	2.5	2.8	2.8	3	4.1	2.4	2.8	2.5	2.2	2.8	3.7	1.9	2.1	3.4
ADRA1D	6.7	6.7	6.4	5.7	8.4	6.4	5.3	5.7	3.9	8.3	5.9	7.7	5.7	5.2	5.7	7	5.2	8.4	5.5	6	6.7	5.3	6.5	6.2	5.7	6.6	7.3	7.2	6.6	7.6	5.5	6.5	7	6.3	6.3	5.2	5.2	5.3	6.4	9.4	5.1	5.8	5.3	4.7	6.1	8.8	4	5.3	7.4
ADRA2A	7.5	8	11.8	15.2	8.6	6.7	5.9	6.9	7	10	7.3	9.4	6.3	6.5	6.8	7.1	6.3	9.8	6.4	7.2	7.7	6.1	7.5	7.7	6.6	7.8	8.7	8.3	11.8	9.3	6.5	7.6	8	7.4	7	6.1	6.2	6.3	7.6	17.2	6	6.9	6.3	6.2	7.1	10	6.2	6.2	8.5
ADRA2C	27.6	36.1	29.9	26.9	39.3	30	25	24.6	20.4	40.2	25.9	36.8	30.2	25.4	12.8	22.4	23	41.9	24.9	26.4	29.5	24.7	29.8	27.8	25.6	30.1	33.5	36.9	28.3	26.8	26.6	34.1	19.8	26.4	28.9	24.9	25.1	23.4	30.3	70.8	27.2	53.1	24.7	21.4	31.1	49.7	25	23	45.1
ADRB1	8.9	9.5	11.8	7.1	11.8	12.1	6.8	7.2	5.2	10.7	7.6	12	8.7	8.4	6.7	8.6	6.5	10.2	7.3	8.1	8.3	6.8	8.4	8	7.5	8.7	9.7	8.7	9	10.2	7.5	8.9	8.4	8.7	8.2	6.8	7.2	7.2	8.3	15.1	6.5	7.6	6.8	6.3	8.7	10.8	6	7.6	11.9
ADRB2	5.9	5.9	4.9	4.5	6	4.3	4	4.3	3.3	6.6	4.6	58	3.5	4.1	15.9	14.7	18.3	46.4	44	37.2	5.3	4.3	42	9.4	4.8	5.3	101.7	101.2	5.9	6.3	16.2	7.7	253.3	266.2	4.8	4.1	65	41.9	5	7	3.9	4.6	4.1	3.5	4.6	6.1	3.2	4.5	5.5
AKR1B1	1147.8	1082.6	871.1	901	14689.3	8463.6	8783.8	10080	407.1	393.1	90.8	47	164	203	409.2	464	87	119.3	673	720.7	78.5	99.6	379.2	312.2	840.1	816.2	387.5	366.7	959.1	627.3	476.2	586.6	908.7	857.4	8.5	11.7	559.2	394.1	1317.3	372.1	362.7	352.1	421.4	352.3	291.8	351.9	72.6	95.5	273.8
AKR1B10	5.1	5.2	4.3	3.9	5	8.7	3.4	3.6	2.9	5.8	3.7	4.7	3.6	3.5	4.6	4.8	3.4	4.8	5.9	17.4	4.7	3.8	4.5	4.4	4.2	4.7	5.4	5.3	5.1	5.5	4.1	5	5.2	4.7	4.2	3.6	4	4	4.8	6	3.4	4	3.6	3.1	4.1	5.4	2.7	3.2	4.8
ALOX5	7.1	7.3	7	5.5	8.1	6.2	6.9	5.8	4.6	9.4	6.7	7.3	5.8	5.9	19.3	12.3	16.2	13.1	5.8	6.7	7.4	5.9	61.8	102.4	9.4	14.7	43.4	43.2	7	8.7	6.4	7.6	18.8	6.7	6.5	5.7	4.8	5.8	6.9	10.8	5.5	6.4	5.8	6.4	6.8	8.6	4.3	4.9	7.8
ALPI	6.4	6	5.5	4.9	6.4	4.9	4.3	4.6	3.6	7.2	4.7	5.7	4	4.7	5	5.9	4.2	6.2	4.8	5.3	5.6	4.7	5.6	5.5	4.9	5.9	6.4	6.5	5.7	6.9	5.2	6	6.4	5.5	5.3	4.5	5	4.7	5.5	7.9	4.3	5	4.5	3.9	5.1	7.1	3.8	4.3	8.7
AMY2A	9.6	10.5	10.9	8.1	15.6	14	8.9	9.7	7.7	14.4	11.6	17	12.4	18.4	11.4	10.7	9.5	20.7	8.6	9	12.9	8.6	15.8	11.2	9.8	11.6	12.8	14.7	12.9	13.2	58.6	67.1	12	11.1	11.2	9	144.4	115.9	11	35.6	8.7	9.9	8.6	7.8	11	14.9	9	13.5	17.4
AR	4.9	4.9	15.8	12.6	4.8	3.6	3.2	3.4	2.8	5.5	3.6	4.4	2.8	3.5	4.3	4.6	3.2	4.6	3.7	4.1	4.4	3.6	4.2	4.2	4	4.5	5.1	5.1	4.8	5.2	3.9	4.6	4.9	4.5	4	3.4	3.8	3.8	4.2	6.1	3.3	3.8	3.4	3	3.8	5.1	2.6	3.2	4.7
ATF2	15.8	7.6	6.8	5.9	8.2	6.5	5.3	5.7	4.1	8.6	6.1	8.1	5.3	6.5	9.4	6.6	5.2	8	5.9	6.4	7	5.2	7.4	6.5	9.7	7	7.8	8.5	7	36.4	6.3	19.4	10.2	7	6.4	5.5	25.8	12.7	6.6	10.9	5.3	6	5.5	4.8	7.1	8.4	4.5	5.5	7.4
ATP1A1	1649.6	1690.2	316.9	367.7	277.8	385	244.7	305.8	857.2	553.9	113.9	160.6	187.7	175.5	635.9	902.6	209.7	268.9	775.6	735.4	544.8	383.5	459.6	560.9	300.7	345	725.8	814.4	448.1	504.7	661	1038	906.7	688.3	823.4	794.3	768.5	474.3	889	317	480.2	520.5	1542.4	1188.3	1321.6	1566.8	252	217.4	1129.2
B4GALT1	10.4	11	8.9	8	15.2	10.3	6.9	7.3	5.9	11.3	7.2	9.2	5.9	6.7	6.4	9.9	6.9	9.8	8.1	8.4	9.6	7.5	9.2	9.2	8.7	9.4	9.9	9.9	10.8	11.3	8.8	10.2	10.7	10	14	7.5	8.5	8.4	9.1	13.3	12.1	8.3	7.4	6.4	8.2	11	6.2	6.3	9.4
BAX	72	287.7	22.9	19.9	35.2	21.2	18.8	19.2	14.4	20.6	21.5	26.7	17.7	19.7	225.8	90.4	16.9	28.1	18.8	24.3	29.8	17.5	90.1	56.4	57.8	71.4	27.5	67.1	29.5	74.3	21.9	71.3	125.6	80.5	34.1	36.1	56.9	18.8	31.3	40.3	19.4	21.2	19	16.6	22.3	58.3	15.9	33.3	26.9
BCL2	7	6.9	5.6	5	6.8	5.4	4.5	4.8	3.8	7.5	5.1	6.5	4.2	4.9	5.3	5.8	4.5	6.5	5	5.4	5.9	5.6	5.7	5.6	5.5	6.1	6.8	6.9	6.6	6.9	12.5	9.1	6.8	5.9	5.5	4.7	6.3	5.1	5.8	9.5	4.5	5.3	4.7	4.1	5.7	7.2	3.8	4.5	6.5
BCL2L1	11.5	11.3	10.8	9	13.3	11.1	10.1	9.8	6.5	12.2	9.5	13.4	10.7	15.1	8.2	9.1	32.7	55.4	12.8	10.1	10.2	8.6	10.8	10.2	8.5	10.4	10.5	10.6	9.7	11.3	8.3	9.6	11.9	10.1	350.3	216.4	8.5	7.9	10.8	31	7.5	9.4	9.1	11.6	10.3	13.8	8.1	9.6	12.3
BIRC5	37.9	45.8	2.8	2.6	3.2	2.5	2.2	2.3	2	3.9	3.3	3	2.1	2.4	3	3.2	2.2	3.1	2.6	2.8	6.5	3	2.9	2.9	2.8	3.1	3.6	3.5	6.6	4	2.8	3.3	3.2	3.2	46.2	61.9	2.5	2.5	7.4	3.9	2.2	2.7	2.4	2.1	2.6	3.5	1.7	2	3.2
CA12	5.7	6.4	8.5	23.2	6.6	5	4.5	4.6	3.9	7.5	4.8	6.2	3.7	4.7	4.9	5.5	4.3	6.3	140.6	224.4	5.3	4.2	5.4	5.4	5	5.8	6.8	6.4	6	6.8	4.6	6.4	6.7	5.2	5.3	4.5	4.4	4.9	5.7	7.6	128.9	193.2	7.8	7.1	5.4	7.1	3.5	3.9	8.3
CA13	6.9	6.9	6.9	6.9	6.9	6.9	6.9	6.9	6.9	6.5	6.9	6.9	6.9	6.9	6.9	6.9	6.9	6.9	6.9	6.9	6.9	6.9	6.9	6.9	6.9	6.9	6.9	6.9	6.9	6.9	6.9	6.9	6.9	6.9	6.9	6.9	6.9	6.9	6.9	3.6	6.9	6.9	6.9	6.9	6.9	6.9	6.9	6.9	6.9
CA2	7.1	7.3	6	5.4	6.8	5.2	4.7	5	420	470.7	5.8	7.7	4	4.6	10	11.3	499.1	738.1	57.7	148.2	3219.7	2548.3	18.3	17.5	6.2	13.8	65	69.9	114.6	97.2	6.1	7	7.6	9.9	9568.7	9367.6	5.8	5.9	6.3	8.6	184.5	275.5	51.3	50.4	79.6	69.2	4.4	4.3	91.6
CA4	7.8	6.8	7.5	6.1	10.4	11.6	6.8	6.5	5.8	13.8	7.8	10.2	7.4	9.9	6.8	7.4	6.6	12	7.1	7.3	7.4	8.3	7.9	6.9	6.5	7.4	8.4	9.4	8.2	8.6	6.8	8.6	8	7.1	8	5.7	6	6	7.8	16.4	6.4	7.1	56	15.5	40.8	24.6	5.9	7.8	9.7
CA5A	5.7	5.7	4.8	4.3	5.5	4.4	3.8	4.3	3.2	6.5	4.6	5.4	3.4	4.1	4.7	5.2	3.8	5.7	4.3	4.7	5.5	4.2	4.9	4.9	4.6	5.1	6	5.8	5.3	6	4.5	5.4	5.5	5.7	4.7	4	4.4	4.4	4.9	8	3.8	4.5	4	3.5	4.5	6.2	3.1	3.7	5.4
CA9	13.4	13.4	10.6	9.6	11.6	10.2	8.4	8.7	7.4	13.8	11	11.8	7.3	9	10.7	11.9	8.2	11.6	9.7	10.4	11.4	9.2	10.8	11	10.4	11.5	13.3	13.3	12.8	13.6	10.1	12.2	12.4	12	10	8.8	10.2	10	10.8	14.2	8.3	9.9	8.8	7.6	9.8	13	6.5	7.7	11.7
CALM1	786.8	748.2	43.8	87.2	70.7	10	74.3	79.1	668.5	543.3	7	34	5.4	6.3	100.4	101.4	130.1	139.3	174.4	229.4	130.1	35.4	98.2	113.9	61.4	72.5	118.6	165.1	122	120.7	55.9	61.7	117.8	110.5	445	464.5	37.6	18.2	347.3	129.1	224.6	318.2	282.5	149.3	110.9	118.7	19.5	4.5	277.3
CASP1	6.6	6.4	5.1	4.6	5.8	4.8	4.1	4.6	3.3	6.7	6.6	40.6	4	4.9	26.7	43.5	4.1	6.9	4.7	5.1	5.7	6.4	484.7	503	6.5	11.9	496.3	403.6	17.2	10.4	78.4	107	132.6	166.2	5	4.3	101.2	84	5.2	7.5	4.1	4.9	4.2	3.8	4.9	6.5	4.5	4	5.8
CASP3	25.7	42.4	10.1	9.5	11.8	8.9	8.2	6.3	7.4	18.3	9.1	11	6.9	7.9	13.3	11.9	9	11.6	14.1	40	36.3	18.3	11.5	21.1	13.7	10.6	13.2	10.8	38.2	14.8	10.4	12.2	51	37	10.1	10.5	13.6	37.5	66.2	16.9	8.3	8.8	8.5	7.2	9.8	13	2.8	7.3	12.3
CASP8	4.3	4.3	3.6	3.2	4	3.3	2.8	3	2.4	4.8	3.1	3.9	2.5	3	5.8	6	2.8	3.9	3.2	3.5	3.8	3.1	5.2	6.8	3.7	3.9	4.4	20.7	4.2	4.6	129.2	58.8	73.1	4.6	3.4	2.9	111	69.8	3.6	5	2.8	3.3	2.9	2.6	3.3	4.4	2.3	2.6	4
CASP9	44.4	39.3	10.8	15.1	384.5	313.2	88.7	62.9	28.3	31.8	55.7	38.2	17.2	25.9	98.2	57.9	24	38.5	14.2	16.1	24.5	27.9	81.6	110.9	67.1	53.7	51.7	61.9	45.8	43.1	41.8	37.3	39.2	69.9	30.9	15.2	36.1	28.6	30	18.2	27.5	31.7	40.6	30.9	31	55.9	15.1	16	43.4
CCL2	3.9	8.1	18.9	25.3	60.7	55.5	48.2	66.6	11.2	19.2	25.5	78.2	12.1	14.1	3.3	4.5	14.7	19.9	11.6	13.9	5.3	4.2	3.2	5	3.7	3.4	15.8	9	13.9	4	3.6	3.9	5.9	3.5	4.4	4.1	3	3	2552.7	2055.1	11.4	15.9	13.9	13	19.7	16.1	72.9	35.8	21.1
CCNA2	301.2	405	6.4	5.8	7.5	5.7	5	5.3	3.8	8.6	5.6	7.6	4.7	5.1	6.6	7.3	5	11.7	13.3	10.5	260.6	179.4	6.5	6.7	6.1	6.5	8.1	7.9	37.5	12.7	5.9	6.5	7	6.4	221.5	414.5	5.3	5.5	89.1	27.3	5.1	5.7	5.3	4.6	6	8	4.2	4.8	7.2
CCND1	6.9	8.1	8.5	28.5	8.2	5.7	5.3	6.4	4.7	9	8.3	7.7	4.6	5.3	7.1	7.1	5.3	9.2	13.3	23.7	7.8	5.5	6.9	6.9	6.6	7.1	8.3	8.3	8.1	7.8	6.3	6.8	7.2	7.7	6.6	5.6	5.8	6.3	8.5	9.4	5.3	6.3	5.5	4.8	6.3	10.3	4.6	4.8	7.5
CCND2	436.9	293.7	4.4	4	4.9	3.7	14.8	12	3.1	5.9	3.8	4.7	3	3.4	4.7	6.6	3.4	5	60.1	92	5.6	7.5	4.5	4.5	4.3	4.8	5.3	6	12.5	10.5	6.9	9.3	23.7	26.7	4.2	3.7	11.4	4.2	4.5	6.3	3.5	4	3.7	3.2	4.1	5.4	2.7	3.1	4.9
CD81	498.7	236.7	1227.1	1264.1	137.9	167.3	265	353.2	855.6	1522.6	352.7	397.6	202.8	229.9	280	267.3	63	104.4	449.4	597.4	246.7	132.9	169.1	81.7	1042.9	1176	124.3	145	357.1	600.9	209.5	256	1015.3	1189.2	5.2	5.5	357.5	281.7	915	266.5	493.8	744.2	464.7	238.3	388.3	442.9	338.9	127.4	484.9
CDK2	88.1	119.8	7	6.5	11.6	6.5	5.9	10.2	4.3	8.8	6.5	11	5.4	6	10	19.3	11	23.9	23.3	7.1	239.6	113.2	6.9	6.7	12	11.5	8.3	8.3	81.9	47.5	10.4	10.7	12.6	9.4	62.2	101.1	10.2	10.2	7.3	13.1	5.3	6.2	5.6	5.1	6.2	8.7	9.3	5.8	7.5
CDK4	1524.9	1165.7	92	102	26.7	27.6	93.5	68	10.1	11.9	32.6	15.4	4.5	5	124.2	86	111.7	194.2	251.3	148.3	659.8	550.7	50.5	53.3	117.8	143.2	98.9	71.3	684.8	753.1	59.9	76.9	103.6	83.8	193	178.6	52.6	49.7	343.2	69.1	5.2	10.2	24.3	29.5	28.8	18.2	4	6.1	15.5
CDK6	5.9	5.7	4.8	4.3	5.5	4.2	3.8	4	3.2	6.5	4.2	5.2	3.4	3.8	4.6	5.2	3.8	5.3	4.4	4.8	5.2	4.2	5	4.7	4.5	5.1	6	6	9.7	8.4	4.6	5.4	5.7	5.1	4.6	3.9	4.5	4.4	4.9	7.7	3.8	4.4	4	3.5	4.5	5.9	3	3.5	5.4
CDKN1A	859.4	552.1	1051	873.1	403.5	248.4	133	217	39.8	76.7	166.5	83.2	127.2	97.2	298.1	359.9	31.4	61.5	1921.1	1607.5	19.7	15.2	423.1	396.1	123.6	122.4	251.2	368.2	10.2	42.7	23.8	27.9	40.5	48.9	53.4	46.1	26.8	27	976.6	339.5	62.5	52.8	47.2	40.5	47.2	91.5	270	228.9	124.9
CHEK1	229	151.4	17.1	12.9	28.4	33.6	14.1	14.8	6.2	15.5	17	42.7	19.7	33.8	15.4	13.1	15.9	31.6	16.4	16.4	133.1	27.6	18.5	17.4	17.6	19	18.7	19.2	88.7	152.5	12.7	14.8	21.8	15.2	51.8	98.9	11.1	14.8	35.2	70.1	14.1	15	13.2	12.9	20.1	33.4	16.2	31.7	20.1
CHRM2	3.8	3.7	3	2.8	3.4	2.6	2.4	2.5	2.1	4.1	2.9	3.2	2.1	2.4	3.2	3.4	2.4	3.4	2.8	3	3.3	2.7	3.1	3.1	3	3.3	3.8	3.8	3.6	3.9	3	3.5	3.7	3.4	2.9	2.5	2.9	2.9	3.1	4.2	2.4	2.8	2.7	2.5	2.8	3.8	3.6	2.2	3.4
CHRM3	4.9	4.7	3.8	3.5	4.3	3.4	3	3.2	12	26.2	3.3	5.2	2.6	3.1	3.9	4.2	3	4.3	3.4	3.8	4.2	3.4	3.9	3.9	3.8	4.2	4.8	4.7	4.6	4.9	3.7	4.3	4.6	4.3	3.7	3.2	3.6	3.6	3.9	6.1	3	3.6	3.2	2.7	3.6	4.8	2.5	2.8	4.3
CHRM4	5.2	5.3	4.5	4	5	3.9	3.5	3.7	3	6	3.9	4.7	3	3.5	4.4	4.9	3.5	5	4.1	4.4	4.8	3.9	4.6	4.5	4.4	4.9	5.5	5.5	5.3	5.7	4.3	5.1	5.4	5	4.3	3.7	4.2	4.1	4.6	6.3	3.5	4.2	3.7	3.2	4.2	5.6	2.8	3.2	5
CHRNA2	7.6	9	7.5	6.6	8.4	6.7	5.8	6.1	5.2	10.8	6.5	8.3	4.9	6	7.4	8.5	13.4	8.2	6.8	7.2	8	6.5	7.7	7.7	7.3	8.2	9.4	13.9	7.7	9.7	7.4	8.6	7.3	8	8.2	4.6	7.2	7	7.6	11.4	5.9	6.9	6.2	5.4	6.9	9.2	4.6	5.3	8.3
CHRNA7	13.6	8.8	6.4	5.8	7.4	6.3	5	5.3	4.5	8.7	5.5	6.7	4.2	4.9	6.7	8.3	5	7	5.9	6.4	6.9	5.6	6.6	6.7	6.3	9	8	8	11	8.2	6.3	7.4	7.8	7.2	6.2	5.3	6.1	5.6	6.5	8.8	5.1	6	5.4	4.6	6	7.9	4	4.5	7.3
CHUK	50.3	59.9	10.6	8.8	14	10.9	8.5	9.1	6.2	30.1	10.6	17.5	8.5	11.4	22.5	10.5	8.4	13	14.1	9.8	16.3	23.4	21.7	10.6	9.3	11.4	45.3	20.2	38.3	26.6	14.2	10.9	20.2	15.1	12.5	20	27.6	15.2	10.8	24.8	8.3	9.8	8.7	7.6	10.4	13.6	8	9.2	12.9
CREB1	29.4	51.8	7.1	5.9	8	6.1	5.5	5.7	5	8.9	6.4	8.5	5.7	5.9	52.2	23.8	5.5	8.8	6.4	7.3	7.9	5.8	8.7	7.6	21.4	8.1	9.2	57.3	12.7	9.4	18.2	18	15.4	8.4	23.1	29.4	44.7	23.3	7.4	13.9	5.4	6.2	6.1	5.3	6.8	9	4.5	5.1	8.1
CSF2RA	5	5.2	4.5	4.1	5.2	4.1	3.6	3.9	2.9	5.9	3.9	4.9	3.2	3.8	143.3	80.8	3.6	5.3	4.1	4.4	4.9	3.8	16.8	18.9	4.4	4.9	7.2	70.4	5.4	5.7	4.2	4.9	5.4	4.8	4.4	3.7	4	4.2	4.5	6.3	3.6	4.2	3.8	3.2	4.3	5.6	3	3.5	5.1
CTRB1	6.2	5.9	6	7.2	7	5.6	8.1	5.1	3.8	7.5	5.4	6.7	4.3	5.2	5.1	5.4	40.6	23	5.2	5.6	6.3	4.9	6.2	5.9	5.1	5.9	7.1	6.4	6.2	7.2	5.4	6	6.2	5.7	6.1	5	5	5.2	6.2	9.3	7.8	5.5	6.5	9.2	6	8.2	4	6.4	7.5
CTSB	21.3	22	870.6	890.9	161.9	104.8	387.3	391.5	251.5	429.4	100.7	118.2	67.7	63.9	843.4	737.9	329.8	449.2	1207.9	1067	353.1	130.2	764.1	940.3	48.4	24.5	426.4	714.6	40	60	48.3	98.7	30.3	21.9	1220.5	1064.9	17.4	19.1	452.7	502.1	221	220.6	244.3	165.1	253.1	202.7	121.8	112.4	194.7
CXCL8	9.7	10.8	9.8	8.1	33.7	15	8.7	8.1	5.6	12.1	17.4	55.5	12	9.8	977.5	667.1	466.6	823.1	218.1	167.3	162.4	49.4	608.1	736.7	10.5	14.9	5764.2	3909.5	25	19.6	8.6	9.4	27	15.2	9.5	9.2	7.8	7.9	704.1	660.8	7.5	9.1	8	6.9	10.6	11.8	91.9	101.8	10.9
CYP51A1	130.1	230.7	62.9	101.8	65.8	314.3	219.5	220.5	98.1	224.6	40.4	32.1	36.7	54.5	29.2	19.8	16.7	35.4	488.7	328.9	23.3	21.4	31.4	24.3	19.7	29.4	27.7	27.8	22.7	27.6	16	20.4	23.1	37.7	27	19.8	10.4	12.7	30.6	52.3	23.5	49.1	50.1	30.9	45.7	46.8	29.8	48.1	62.5
DHCR7	524.3	637.9	236.2	213.6	105.5	247	403.1	298.7	57.7	45.9	25	19.3	21.8	23.8	26.7	22.8	26.2	42.5	585.2	388.9	29.5	4.8	28.3	28.2	25.7	29.6	21.1	18.4	10	39.1	13.3	25.6	32.9	13.5	13.3	23.6	24.9	11.7	34.2	43	34.9	55.1	41.1	63.8	39.7	48.9	20.4	21.7	32.6
DPP4	7.5	7.8	12.8	22.6	12	7.7	15.6	19.6	5.3	10.5	6.7	9.8	5.7	6	132.6	89.1	6.1	9.2	7.1	7.3	8.4	6.8	7.9	8	7.6	8.1	9.7	9.6	9.1	10	98.7	98.4	9.3	7.5	7.5	7.1	85.1	86.6	57.4	11.6	6.2	7.3	11.4	6.9	7.5	10	5.3	5.4	23.9
DRD1	7.5	8.2	7.3	6.3	8.6	7	6	6.6	4.8	9.7	6.5	10.1	6.8	11.6	6.2	7.7	5.8	9.7	6.4	6.6	7.8	6.1	7.6	7.4	6.4	7.9	8.7	8.1	8.1	8.6	6.7	7.8	7.8	7.2	7.3	6	6.2	6.5	7.4	12.5	19.1	8.9	6	5.3	7.6	10	5.8	7.5	8.7
DUOX2	5.4	5.9	5.2	4.5	6.2	5.4	4.2	4.6	3.3	6.9	5.8	6.5	3.8	5	4.7	5.3	4.2	6.2	4.6	5.1	5.4	4.6	5.4	5.2	4.8	5.6	6.2	6.1	5.5	6.4	4.8	5.6	5.9	5.3	5.1	4.3	4.6	4.6	5.3	8.5	4.2	4.8	4.4	4.8	5	6.9	3.4	4.1	6
ENPP7	6.9	6.9	6.9	6.9	6.9	6.9	6.9	6.9	6.9	6.5	6.9	6.9	6.9	6.9	6.9	6.9	6.9	6.9	6.9	6.9	6.9	6.9	6.9	6.9	6.9	6.9	6.9	6.9	6.9	6.9	6.9	6.9	6.9	6.9	6.9	6.9	6.9	6.9	6.9	3.6	6.9	6.9	6.9	6.9	6.9	6.9	6.9	6.9	6.9
EPAS1	4.8	4.4	443	491.2	214.7	248.1	383.4	497.6	190.1	385.4	349.1	608.8	101.6	81.8	3.8	4.1	40.9	38.5	512.1	462.4	120.4	90.6	4	9.2	3.5	5.4	9	4.7	7.6	4.5	3.6	4.1	4.9	4.1	8.5	14.4	6.2	3	356.2	168.1	176.1	270.8	160.5	195.7	180.1	147.1	194.6	143.6	341.9
ESR1	4.9	4.9	4.1	4	4.8	3.7	3.3	3.4	2.7	5.5	3.6	4.4	2.9	3.3	4.2	4.5	3.2	4.7	3.7	4	4.4	3.6	4.2	4.2	3.9	4.5	5.1	5	4.8	5.3	3.9	4.6	4.9	4.5	4	3.4	3.8	3.8	4.2	6.1	3.3	3.8	3.4	3	3.8	5.2	2.7	3.1	4.7
ESR2	5.1	5	4.2	3.8	4.7	3.8	3.3	3.5	2.8	5.6	3.6	4.5	2.9	3.3	4.3	5	3.3	4.7	3.8	4.1	4.5	4.4	4.3	4.3	4.1	4.6	5.2	5.1	4.9	5.5	4.1	4.7	5	4.7	4.1	5.5	3.9	3.9	4.2	6.5	3.3	3.9	3.5	3	3.9	5.2	2.7	3	4.8
F10	5	5	4.2	3.8	6.2	3.6	3.3	3.5	2.7	5.6	3.6	4.4	3.9	3.3	4.3	4.6	3.2	4.7	3.7	4	4.5	3.6	4.4	4.1	4.1	4.6	5.2	5.3	4.9	5.3	4	4.8	4.8	4.8	4.1	3.5	3.9	3.9	4.3	6.1	3.3	3.9	3.5	3	3.9	5.2	7.7	5.7	4.7
F2	5.2	5.2	4.3	3.8	4.8	3.8	3.4	3.5	2.9	5.7	3.7	4.5	2.8	3.4	4.4	4.7	3.3	4.8	3.9	4.2	4.6	3.7	4.4	4.4	4.1	4.7	5.3	5.2	5	5.4	4.2	4.9	4.9	4.8	4.1	3.6	4	4	4.3	6	3.4	4	3.5	3.1	4	5.3	2.7	3.6	4.8
F7	4.8	4.8	4	3.6	4.6	3.4	3.2	3.3	2.7	5.4	3.5	4.2	2.7	3.2	4.1	4.3	3.1	4.5	3.6	3.9	4.3	3.5	4.1	4.1	3.8	4.3	4.9	4.9	4.7	5	4.6	4.5	4.7	4.4	3.9	3.3	3.8	3.7	4	6.1	3.2	3.7	3.3	2.9	3.7	4.9	3.3	3.1	4.5
FASLG	4.8	4.8	4	3.7	4.6	3.6	3.2	3.5	2.7	5.4	3.5	4.3	2.8	4.6	4.2	4.4	3.1	4.5	3.6	4	4.3	3.5	4.1	4.1	3.9	4.4	5	4.9	4.7	5	3.9	4.6	4.9	18.5	3.9	3.4	3.9	3.8	4.1	5.8	3.2	3.7	3.4	2.9	3.8	5	2.6	3.3	4.6
FASN	769.7	389.5	8895.9	6059.2	40.9	151.2	126.1	77.5	289.8	508	20.3	86.2	23.3	64.5	24.1	27.2	27.2	28.2	448.8	1136.8	53.4	42.8	22.2	23.7	22.2	25.4	28.6	27.7	43.3	39.6	22.1	26.3	27.6	26.9	22.1	23.9	25.5	21.4	30.3	23.3	76	137.1	143.7	135.5	144	68.8	141.4	81.8	74.5
FGF1	5.2	5.1	4.4	3.9	5	3.8	3.4	3.6	74.9	205.3	3.8	4.6	41.3	5.2	4.3	4.7	3.4	4.8	3.9	4.3	4.7	3.8	4.5	4.5	4.2	4.7	5.3	5.3	5	5.5	4.1	4.9	5.1	4.7	4.2	3.6	4	4	4.4	6.5	140.5	223	38.1	28.5	42.8	51.5	22.3	25.4	157.1
FGF2	5.5	5.3	5	9.4	5.5	4.2	3.9	4.7	3.1	6.2	4.4	5.1	3.3	3.9	4.5	5	7.1	6.4	4.2	4.6	4.9	4	4.7	4.7	4.5	5	5.7	5.5	5.2	5.8	4.3	5.2	5.4	5.1	4.5	3.9	4.2	4.2	5.7	7.4	3.8	4.6	3.9	3.4	4.4	5.9	4.4	3.6	5.6
FOS	4.8	4.6	3.7	3.5	317.9	9.4	182.6	237.4	67.6	19.5	145.1	171.1	103.8	91.9	3357.1	3292.7	902.9	1343.3	6.7	6.2	687.2	275.3	3749.8	5027.9	373.8	174.7	6724.7	8837.5	1718.9	2215.1	364	580.5	1043.6	698.1	174.6	166.7	211.1	226.7	3.9	5.8	11.9	31.7	11.1	17.3	6.7	26.3	260.1	150.5	4.3
GABRA1	6.2	6	5.3	4.8	6	4.7	4.3	4.4	54	111.5	5	5.8	3.8	4.2	5.1	5.4	4.1	5.8	4.7	5.2	5.4	4.5	5.3	5.1	4.7	5.6	6.5	6.2	6.1	6.6	5	5.8	6	5.7	5	4.3	4.6	4.6	5.3	8	4.2	4.9	17.8	9.1	76.9	39.4	3.3	3.9	7.9
GABRA2	7.2	7.3	6.9	5.8	8.5	6.6	5.4	5.7	167.5	475.4	6.5	8.6	6.2	6.7	6.1	6.7	5.5	8	6.3	6.8	7.5	6	7.3	7	6.7	7.5	8.1	8.4	7.2	8.8	6.6	7.2	7.6	7.2	6.7	5.8	5.8	6.4	7	13.7	7.6	59.9	8.1	6.1	7.4	13.9	5.2	6.6	8
GABRA3	5.8	5.6	4.8	4.2	5.5	4.3	3.8	4	3.2	6.3	4.5	5.9	3.6	4.4	4.7	5	3.7	5.5	4.3	4.6	5.1	4.1	4.9	4.8	4.5	5	5.8	5.7	5.6	6	4.7	5.2	5.5	5.1	4.8	4.3	4.3	4.4	4.8	7.7	3.8	4.4	4	3.4	4.5	6.1	3.1	3.6	5.4
GABRA5	6.9	7.1	6.6	5.6	8.2	6.7	5.3	5.7	486.6	895.8	6.2	9.5	5.7	6.1	5.9	6.4	5.3	8.1	5.8	6.2	6.9	5.5	6.7	6.5	5.9	6.9	7.7	7.5	6.8	8	5.8	6.8	7.2	6.8	6.5	5.4	5.6	5.6	6.7	12.8	90.2	123.5	5.5	4.8	6.3	8.5	4.6	5.6	7.7
GAP43	8.6	10.3	9.3	8	17.9	12.3	7.8	8.4	2000.8	3512.6	16.3	18.6	14.5	20.8	7.5	8.6	7.8	13.4	8.4	8.8	9.9	8.2	11.7	12.5	11.5	10.2	11	10.8	10.7	11.7	8.5	10	10.5	9.3	9.4	7.9	7.4	7.6	10.6	41.1	306.6	439	480.8	531.3	391.1	288.2	15.6	17	1720.1
GPBAR1	4.6	4.7	4.9	4.9	4.9	4.9	4.9	4.9	4.8	4.6	4.8	4.8	4.8	4.7	4.8	4.8	4.9	4.9	4.8	5.2	4.8	4.8	48.7	26.1	4.8	4.8	6.9	22	4.7	4.7	4.8	4.7	7.8	4.8	4.8	4.8	4.7	4.7	4.9	2.5	4.9	4.9	4.8	4.8	4.9	4.9	4.8	4.8	4.8
GRIA2	5.1	5	4.3	3.8	5	4.4	3.4	3.6	752	860.1	4.2	4.9	3	4.1	4.5	4.6	3.4	4.9	3.9	4.2	4.6	3.7	4.5	4.4	4.1	4.6	5.3	5.2	5	5.4	4.1	4.8	5	4.6	4.2	3.6	3.9	3.9	4.4	6.7	375.9	328.7	65.2	69.3	135.3	91.3	2.9	3.5	889.1
GSK3B	55.1	18.8	15.5	14.9	17.9	13.7	12.2	13	10.7	20	13.2	16.2	10.2	11.9	19.1	18.2	12.3	17.3	56.4	78.4	16.7	13.3	29.9	39.1	35.9	28.8	20.4	34.8	17.4	19.3	14.5	16.8	31.3	46.7	15.1	13.2	18	17.3	15.7	21.3	10.2	6.1	12.5	11.1	14.2	28.6	8.2	9.4	17.1
HERC5	13.8	14.4	12.3	9.8	13.7	10.7	9.4	10.8	7.9	15.5	18.1	25.5	8.6	9.6	122	14.8	9.5	15.3	10	11.6	13.2	8.1	12.7	13.5	12.1	20.8	15.4	15.3	14.7	15.6	13.1	15.8	17.1	13.9	11.1	9.4	18.6	11.6	10.9	18.3	9.4	10.9	9.8	8.3	11.3	14.8	14.9	8.8	13.6
HMOX1	4.9	4.9	13.4	23.5	4.5	3.4	3.1	3.3	2.7	5.3	3.4	4.2	2.6	3.1	6.7	16	3.2	10.4	3.6	4	311	50.3	189.9	221.3	4	4.4	19.4	41.3	4.8	5.1	3.8	4.4	157.8	159.4	3.8	3.3	3.6	3.6	5.3	5.9	3.1	3.7	3.3	2.9	3.7	4.9	2.6	2.8	4.4
HRAS	118.5	142.7	54.9	49.5	31.8	41.2	27.4	21.5	106.9	181.9	22.3	37	12.2	23.3	53.3	72.6	15.1	29.4	236.4	261.2	107.9	45.5	44.2	31.8	54.9	85.3	68.3	67.5	42.7	67.2	65.7	34.3	82.1	46.2	40.8	35.7	37.1	39.1	146.8	120.5	173.5	173	92.9	39.7	85.8	135.9	18.5	18.7	46.9
HSD11B1	7.3	9	145.7	139.1	8.5	7.1	6.2	6.4	6.2	10.6	9.4	7.1	5.6	6.4	5.8	6.2	6.2	9	48.3	69.6	6.2	5.2	6.3	5.5	5.8	8.3	9.4	7.3	8.7	8.1	7.3	9.4	7.1	8.3	7.4	6.6	4.9	7	7.8	10.4	7.5	9.5	6.9	5.7	7.4	9.9	24.7	5.9	16.9
HSD11B2	3.6	3.6	3.2	2.9	3.5	2.7	2.5	2.6	2.2	4.1	2.8	3.4	2.1	3.5	3.3	3.6	2.5	3.5	2.9	3.2	3.4	2.8	3.3	3.3	3.1	3.5	4	4	3.8	4.1	3.1	3.6	3.8	3.6	3.1	2.7	2.8	2.9	3.2	4.4	2.5	3	2.7	2.9	3	3.9	2	2.2	3.5
HSP90AB1	6183.4	5875.6	821.4	859.6	1233.3	944	1126.1	1369.6	1325.4	2043.6	298.1	359.3	382.7	461.7	1532.4	1764	423.7	615.4	2384	1829.4	1932.5	1611.3	802.2	823.3	1562.6	1506.4	841.9	1244.9	3551	4072.2	1649.9	1793.3	1199.7	1011.3	516.6	645.8	1724.3	1342.4	2291.6	1021.8	938.9	1513.3	1324	995.9	2171.6	2383.7	475.8	388.1	1858.8
HTR2A	5.1	5.1	4.3	3.9	5.1	3.8	3.5	3.6	3.1	5.9	3.8	5.1	3.1	5.8	4.4	4.6	3.3	4.8	3.9	4.3	4.7	3.8	4.4	4.4	4.2	4.7	5.4	5.5	5.2	5.5	4.2	4.9	5.1	4.7	4.2	3.6	4	4	4.4	6.2	3.5	4	3.6	3.1	4	5.4	2.8	3.3	13.1
HTR3A	5.8	5.5	4.8	4.3	5.7	5.4	3.7	4	3.1	6.3	15.6	5.2	3.8	5.9	5.1	5.4	3.8	6.1	4.2	4.7	5.1	4.1	4.8	4.8	4.5	5.3	5.8	6	5.3	6	4.4	5.2	5.5	5.1	4.6	4	4.3	4.3	4.9	7.4	3.8	4.4	3.9	3.5	4.5	6.1	17.3	6.3	6.1
ICAM1	106.2	89.8	39.7	33.9	49	28.1	56.3	60.1	24.4	58.5	46	47.9	27.1	31.4	52.9	32.6	31.9	67.8	34.8	36.1	4.8	6.3	40.6	44.2	15.4	7.5	61.4	48.8	5.8	8	12	9.7	12.1	8.4	14.4	10.5	10.4	9.4	89.2	36.7	31.7	36.8	39.8	29	37.2	49.3	38.1	37.1	44.7
IGHG1	5416.3	5377.3	6.4	5.7	7.3	5.7	1106.9	1514	4.2	8.1	612.1	535	4.4	5.1	11585.3	16922.9	6874.8	10395.1	6	6.6	1971.6	726.3	23	58.1	2739.1	4096.1	7.9	9.1	145.5	191.5	10.4	14.7	5424.1	3789.2	232	239.6	111.4	32.1	6.5	9.6	5.1	6.2	5.3	4.6	6	8.2	5	4.7	7.3
IL1B	5.3	5.2	4.5	4.1	5.4	3.9	3.8	3.8	3.1	6	5.2	5.9	5.4	8.1	322.8	277.6	3.5	5	581	668.7	4.8	3.9	22.2	26.8	4.1	4.7	1468.6	1252.9	341.5	155.1	4.2	4.9	5.2	4.8	4.2	3.7	4.1	3.9	47.2	15.4	4.2	4.2	4	4.2	4.3	6	3.9	4.2	5.1
IL2	7.2	7.3	6.8	5.8	8.7	7.1	5.6	6	4.1	8.9	6.4	12.3	5.4	11.8	6.1	6.7	5.5	8.5	6	6.4	7.1	5.8	7.5	6.7	6.1	7.1	8.2	7.7	7.6	8.3	6	7.1	7.5	6.9	6.7	5.6	5.7	5.9	6.9	14.4	5.5	6.2	5.7	5	7.1	10	4.9	8	8
IL6	5.8	5.8	5.1	4.6	6.2	4.7	4	4.3	3.4	6.8	13.6	13.7	3.6	4	4.9	5.3	4	5.7	4.6	5.1	5.4	4.4	5.3	5.2	5.1	5.6	6.2	6.4	5.6	6.3	4.8	5.6	5.9	5.3	4.9	4.2	4.5	4.7	482.1	227.6	4	4.7	4.2	3.7	4.8	6.4	17.4	41.4	5.8
INPPL1	36.3	24.9	5.8	5.1	7.2	5.3	4.7	4.8	4.1	7.7	5	5.8	3.8	4.4	32.8	40.3	4.5	6.7	5.3	7.3	30.8	15.3	56.5	64.6	21.2	24.5	105	122.5	51.6	53.1	33.4	30.5	62.5	55.1	8	6.9	39.6	36.7	8.5	8.1	4.4	5.2	4.6	4	5.2	6.9	3.5	4	6.3
JUN	29.9	27.2	24.1	35.6	174.9	136.7	137.6	135.5	183.7	324.9	215.5	433	16	18.6	1015.6	645.9	48.2	89.1	129.4	331.5	396	315.1	548.1	712	1299.1	1224.2	2612.3	3167.5	287.9	393.9	354.7	374	382	395.4	14.1	12.8	290.8	302	109.4	30.4	38.1	32.7	174	149.1	86.6	80.8	131.2	119.3	141
KCNH2	4.7	4.7	3.9	3.6	4.6	3.5	3.1	3.3	4.1	5.8	3.4	4.3	2.8	3.1	4	4.6	29.2	90.9	3.6	3.9	868.7	570.6	4	4	3.8	4.3	4.9	4.9	79.3	48.5	4	4.5	4.7	4.4	275.4	279.1	4.3	3.7	4	5.9	6.2	4	8.1	9.4	11.3	17.4	2.5	3.2	4.6
KCNMA1	6.1	5.8	5.1	4.4	6	4.4	4.1	4.3	3.4	6.7	13.9	5.7	7.1	4.1	4.9	5.6	4	5.7	4.6	5	5.5	4.4	5.1	5	4.8	5.5	6.3	5.9	6	6.4	4.7	5.5	6.1	5.3	4.9	4.2	4.5	4.5	5.1	8.9	4	4.7	4.2	3.6	4.8	6.2	3.4	3.9	5.6
KDM4A	11.4	11.2	9	9.2	12.2	7.8	7.1	7.4	6.4	11.4	8.7	9.8	6.4	7.5	13	9	6.9	10.4	7.9	8.5	8.5	7.5	9.6	10.5	8.9	9.9	13.5	17.6	14.4	11.5	11.9	12.9	10.1	10.3	6.2	6.7	10.3	7.9	7.8	12	7.3	12.5	7.4	9.2	10.1	11.2	5.9	6.2	10.1
KDR	9.2	9.6	8.9	7.5	11.2	7.9	7.7	8.4	5.5	11.5	8.4	14	7.2	7.1	7.6	8.4	7.3	12.5	8.1	8.3	11.3	19.6	9.3	8.7	7.9	9.9	10.4	9.9	10.6	11.5	8.6	10.2	10.8	8.9	8.9	7.5	8.4	7.5	24.2	25.2	7.1	8.3	7.4	6.5	8.9	11.1	7.2	6.8	10.6
LITAF	1115	950.9	75.8	74.2	71.2	231.6	64.8	134.8	111.6	163.3	108.3	137.4	79.6	155.3	1241.2	1395.8	494	736.8	767.3	708.3	117.2	75.6	1474.8	1175.8	1360.5	1519.2	1045.1	769.7	387.4	373.6	1044.4	1269.3	3780.8	5055.6	56.4	31.6	1242.2	1313.7	73	16.2	159.6	163	61.9	37.5	76.1	95.8	246.1	97.3	49.6
LTA4H	326.6	280.1	80.2	71.7	256.8	81.8	74.9	77.1	26.7	46.6	6.6	28.5	16.4	8.2	1036	943.1	509.7	716.1	456.4	562.1	308.2	247.1	2719.1	2705.4	1751.6	2008.9	2926.9	2518.8	853.4	839.6	364.2	482.3	669.8	697.3	89.6	91.8	368.6	337.5	155.9	45.1	19.7	50.1	43.5	31.8	35.3	57.6	23	11.1	35.1
MAOA	12	12.7	269.7	158.5	33.1	21.4	19.8	17	10.8	21.4	16.2	23.2	30.5	29.6	10.6	13	13.7	28.7	91.1	30.2	17.3	13.2	18.8	16.4	15.6	17.5	20.7	19.8	17.7	20.1	10.9	15.8	19.1	13.7	16.6	16.2	11.3	10.6	17.2	54.6	13.8	15.7	13.4	12.4	17.4	22.9	24.5	35.8	22.4
MAOB	5.6	7.4	10.2	9.2	15.4	9.1	10.9	11.3	101.9	101.7	8.9	10.9	6.8	8	4.2	8.1	7.9	11.2	7.9	10	11	8.8	7.8	5.2	9.8	11	5	7.7	8.1	11.8	9.8	11.6	7.5	9.5	3.5	4.1	6.9	9.4	10.4	13.8	24.2	116.8	8.6	7.5	8.3	12.6	6.5	7.3	11.7
MAP2	6.1	6.1	5.6	4.8	6.5	7.3	4.5	4.8	14	23.2	5.1	6.3	4	4.4	5.1	5.6	4.3	6.4	5	5.8	5.8	6.2	5.6	5.4	5	5.7	6.7	6.4	6.1	6.8	5	5.9	6.1	5.7	5.3	4.5	4.9	4.8	5.6	9.2	6.9	6.3	4.9	4.2	5.9	18.9	5	4.6	9.1
MAPK14	109.4	108.9	11.6	10.5	12.9	9.6	9.1	9.5	7.3	10.6	9.7	12.1	7.5	8.5	89.5	84.4	75.2	70.6	32.4	19.9	58.7	91.2	234.9	245.2	62.1	50.5	325.2	322.9	389.4	256.2	115.4	98	168.8	115.4	88.3	83.9	108	90.4	18.6	15.7	8.8	6.7	9.7	8	10.4	13.8	7.6	5	12.8
MAPK8	5.4	4.5	4.4	4	5.1	3.7	4.1	3.7	3	5.9	3.8	4.8	3.8	6.3	4	4.7	4	5.1	4	3.8	4	3.8	4.5	4.5	4.3	4	5.5	5.1	5.1	5.6	3.8	4.9	4.9	4.1	4.3	3.7	4	4	3.7	5.9	4.6	6.6	5.6	5.2	4.2	5.5	3	4.5	5
MAPK8IP2	31.7	29.6	40.1	31.3	42.2	30.3	26.9	31.3	108.7	177.9	31.7	36.1	23.5	26.5	30.3	33.7	24.4	42.3	23.6	25.4	28	28.1	36	32.6	30.1	34.7	38.2	38.5	36.2	40.7	30.4	35.5	37.3	35.2	33.1	28.7	23.2	24.7	33.9	47.4	43.4	47.2	37	48.9	32.7	190.7	22.1	25	85.8
MCL1	13.5	15	6	7	7.4	5.2	4.5	4.8	3.7	7.1	4.9	6	4	4.6	390.7	137.1	4.5	6.7	8.1	30	21.7	6	36.8	161.6	6.4	17.2	438.4	1478.8	31.9	24.7	95.7	128	36.7	10.6	6.1	8.2	137.8	30.1	9.4	9	4.5	5	4.6	4	5.3	7.1	4.3	4.3	6.4
MIF	3722.3	3353.9	461.7	488.1	581.2	605.1	1247.9	1286.1	971.6	2033.5	106.5	191	59.8	83	864.5	466.2	310.4	365.8	1983.4	3055.7	485.3	135.4	101.1	225.4	843.4	543	42.8	183	1339	1431.1	608.5	617.6	471.9	377.1	15.2	15.2	603.2	551.9	2434.1	1106.2	408.2	600.9	614	370.5	809.4	1001.7	131.6	13.1	610.9
MMP1	6.6	6.8	6.2	5.3	7.6	6.7	5	5.3	3.8	8.1	6.1	7.2	5.6	6.9	5.6	6.2	5	7.6	478.4	368.6	6.4	5.2	6.3	6.1	5.6	6.5	7.3	7.1	6.6	7.6	5.6	6.9	6.9	6.4	6.2	5.1	5.3	5.4	2537.2	3022.8	4.9	5.6	5.1	4.5	5.9	7.9	4.6	5.2	7.1
MMP10	6.4	6.4	5.7	5	7	7.1	4.7	5	3.6	7.5	6.1	6.7	4.3	5.2	5.7	5.8	4.7	7.2	21.1	7.5	6	4.9	5.9	5.9	5.5	6.2	7	7	6.1	7.1	5.2	6.1	6.7	6.2	5.6	4.8	5.2	5	8.9	10.1	4.6	5.2	4.8	4.2	5.5	7.4	3.9	4.7	6.6
MMP2	5.3	5.6	2495	3423	10.3	55.2	128.8	135.9	6	15.1	153.5	251.6	17	23.6	6.9	4.9	8.6	15.3	41.5	40.6	8.3	7.4	8.9	6.3	8.2	8.4	6.8	5.6	9.7	10.9	7.1	8.3	8.8	5	8.5	6.7	6.7	7.9	839.3	268.5	10	10.4	9.3	7.2	21.4	13.6	6.9	9.1	11.5
MMP3	5.7	5.7	9.4	25.5	5.9	4.5	3.9	4.1	3.2	6.4	5.9	5.5	5.7	6.7	4.8	5.1	3.9	5.8	4.4	4.8	5.2	4.2	5	4.9	4.6	5.2	5.9	5.8	5.5	6.1	4.6	5.3	5.6	5.3	4.8	4.1	4.4	4.4	4.9	8.1	3.9	4.5	4.1	3.6	4.7	6.2	3.2	4	5.6
MMP9	14.3	5.7	4.6	4.3	5.3	4.1	3.7	4.1	3.1	6.2	4	4.9	3.2	3.5	3.4	4.9	370.4	394.4	4.2	4.6	4.8	7	4.6	4.7	4.3	4.1	5.7	6	5.4	5.7	4.3	5	4.9	4.9	4.3	3.7	3.8	3.8	4.2	6.8	3.7	4.3	5.4	3.4	4.4	5.9	2.9	3.4	5.2
MTOR	24.3	32.1	19.3	17.2	23.7	20	14.9	15.8	13.6	25.6	16.7	19.9	12.6	14.7	19.5	20.8	11.1	21	17.4	19.4	20.8	16.7	19.7	19.4	18.2	21.1	24.3	24.3	33.9	24.3	20.5	23.8	64.2	24.9	24.6	16.2	21	17.7	19.2	25.7	15.4	21.4	16.3	14	18.2	24.1	11.7	13.2	21.8
NCF1	127.5	157.7	2.8	2.5	3.1	2.4	2.2	2.3	2	3.8	2.4	2.9	1.8	2.1	337.2	375.4	51.8	102.7	2.6	2.8	3.2	2.5	538.9	786.7	650.2	441.1	401	593.2	3.6	3.6	2.8	3.3	3.8	3.2	2.7	2.3	2.7	2.7	2.9	3.9	2.2	2.6	2.3	2	2.6	3.5	1.7	2	3.1
NCOA1	9.8	9.8	7.4	6.2	9.1	7.4	6.4	6.7	22.7	12.9	7.1	8.7	5.7	6.9	32	22	6.2	8.9	6.4	8.5	8.8	7	8.8	9.1	8.4	9.3	19	18	11.6	8.8	9.5	29.4	43.5	92.6	7.4	6.3	11.4	10.6	8.2	14	6.4	6.8	6.4	6.6	7.6	10	5.4	6.2	9
NCOA2	5.9	5.4	4.8	4.1	5.6	4.3	3.8	4	3.4	6.2	6.4	5.3	3.5	4.4	4.7	5.1	3.7	5.3	4.2	4.7	5.2	6.5	4.9	4.7	4.5	5.2	6	6.5	5.6	6.1	4.7	5.5	7.7	5.3	19.6	4	4.5	4.4	4.7	7.6	3.8	4.3	4	3.5	4.8	7.4	3	3.8	5.3
NOS2	4.8	4.8	4	3.6	4.5	3.5	3.1	3.3	2.8	5.4	3.7	4.2	3	3.2	4.1	4.4	3.1	4.4	3.6	4	4.3	3.5	4.2	4.1	3.8	4.3	4.9	5	4.7	6.7	3.9	4.6	4.8	4.4	3.9	5.9	3.7	3.7	4	6	3.2	3.7	3.3	2.9	3.7	4.9	2.5	2.9	4.4
NOS3	4.9	4.8	4	3.6	4.6	3.4	3.1	3.3	2.7	5.3	3.4	4.2	2.7	3.1	4.1	4.4	3	4.4	3.6	3.9	4.3	3.4	4.1	4.1	3.9	4.3	4.9	4.9	4.7	5	3.8	4.5	4.7	4.4	3.8	3.3	3.7	3.7	4	5.6	3.1	3.7	3.3	2.8	3.7	4.9	2.7	2.9	4.4
NQO1	7.3	9.2	28.7	99.4	7.1	5.6	5.9	5.4	3.8	7.9	5.2	6.6	4.6	5.6	5.2	6.6	4.8	6.9	240	95.1	6.4	5.2	6.3	5.5	5.6	6.7	7.6	6.4	6.5	7.8	5.6	6.7	6.2	6.7	5.8	5.1	5.3	5.5	60.6	11.2	8	5.9	5.1	4.4	5.9	9.8	4	4.6	6.8
NR3C1	1060.8	669.3	91	101.8	37.6	17.7	59.7	45.9	34.1	64.4	67.2	107.3	13.5	44.9	421.7	359.5	58.8	84	82.5	78.1	171.2	87.8	226.5	471.1	472.9	490.7	702.1	406.4	281.9	133.5	355.3	208.1	533.7	363.6	71.2	83.2	330	370.9	113.7	30.9	31.4	31.2	63.8	54.1	114.8	147.6	60.5	24.1	53.6
NR3C2	7	7.3	7.1	5.8	8	7	5.5	6	13.7	42.4	6.5	8.2	4.7	7	6	6.6	5.5	8.3	6.2	6.4	6.6	5.9	7.3	7.1	6.8	11.1	7.9	7.2	7	7.6	10.9	9.4	7	6.8	6.8	5.6	13.7	19	6.8	13.6	5.6	8	6.1	8.9	7	8.8	4.7	5.7	8.8
NRAS	51	55.2	7.3	6.6	8.2	6.4	5.7	6	5	8.8	6.3	7.7	5.2	6.6	73.2	50.9	5.6	9.5	10.5	20.9	29.7	7	8.1	11	11.3	9.3	13.3	20.8	10.4	9.4	7.2	8.4	39.5	9.1	10.1	7.7	7.7	9.5	13.4	10.8	5.7	6.1	6	5.1	6.7	9	4.7	6.4	7.9
OLR1	8.2	8.2	8.1	6.7	10.1	7.8	6.5	7	5.1	10.8	7.6	11	6	7.8	7.6	8.2	8.4	11.3	7.3	7.7	8.5	6.9	8.4	8.1	7.1	8.5	9.3	9.4	8.2	13.3	7.4	8.8	8.7	8	8	6.7	7.1	7.2	8.4	16.3	6.5	7.5	6.8	5.9	7.8	10.3	5.7	6.3	9.3
OPRM1	5.9	6	5.4	4.8	6.5	5.1	4.3	4.6	3.4	7.1	5	6.1	4	4.7	5	5.6	4.3	6.3	4.8	5.2	5.7	4.5	5.5	5.4	5	5.7	6.5	6.4	5.9	6.7	4.9	5.9	6	5.6	5.2	4.5	4.7	4.7	5.4	8.4	4.3	5	4.5	3.9	5.2	6.9	3.6	4.3	6.2
P4HB	876.8	1049.1	1457.3	1593.8	792.5	918.8	1023.7	1191.4	198.1	272.1	215.2	172.1	107.6	240.4	1359.3	1795.9	798.6	1064.2	2503.3	1931.1	743.5	566.5	1028.1	879.4	518.6	576.7	1026.7	1643.2	1162.6	1500.5	504.5	599	1234.4	726.7	465.3	403.4	494.6	485.1	3415.8	1922.7	121.5	239.5	238.4	149.7	244	307.9	152.5	149.7	178.5
PDE3A	5.6	5.7	4.9	4.4	5.5	4.5	3.9	4.1	3.2	6.5	9.5	5.3	3.5	4.2	4.9	5.4	3.9	5.6	4.4	4.8	5.3	4.3	5	5	4.6	5.3	6.2	6.1	5.8	6.3	4.6	5.7	5.9	5.5	4.7	4.1	4.6	4.4	5	7.7	3.9	4.6	4	3.5	4.7	6.3	3.2	3.8	5.6
PECAM1	7.2	9.5	8.4	7.3	10.6	7.1	10.9	7.5	5.6	11	10.4	13	5.7	6.8	250.6	144.6	10.2	10.5	6	6.4	8.8	7.1	389.4	541.4	10.7	9.2	310.3	526.2	16.4	20.6	8.1	9.5	108.1	15.7	7.8	6.8	20	19.4	8.8	11.6	8.4	8.2	6.9	6	7.8	13.4	6.7	6.6	9.6
PGR	5.4	5.3	4.8	4.1	5.4	4.4	3.8	4	3.2	6.4	4.9	5.3	3.3	3.8	4.6	5.2	3.7	5.3	4.3	4.5	5.2	4.1	4.9	4.9	4.4	5.2	5.9	5.8	5.6	6.1	4.6	5.4	5.7	5.3	4.6	4	4.4	4.4	4.8	7	3.8	4.4	3.9	3.4	4.5	5.9	3.1	3.5	5.4
PIK3CA	46.6	34.2	9	7.5	8.7	7.2	5.8	6	4.1	9.8	6.5	8.6	5.6	8.7	7.6	7.5	5.6	8.6	6.6	6.9	7.4	5.7	8.7	13.4	59	44	31.5	22.7	12.6	9.2	29	50.4	34.7	24.1	7	6	85.9	35.5	8.3	12.1	5.6	6.2	5.8	5.1	7	10	4.9	6	8.2
PIK3CG	13.8	11.9	4.7	4.1	5.3	4	3.7	3.9	3.3	6.2	4.1	5.1	3.4	3.8	30.1	31.2	3.6	5.4	4.2	4.6	4.9	4.1	4.9	6.1	4.4	5.2	5.9	11	5.5	6	4.7	5.9	49.3	5.6	4.5	3.9	4.5	5.9	4.8	7.6	3.7	4.3	3.9	3.4	4.4	5.9	3	3.6	5.3
PIM1	13.7	11.1	5.4	5.3	7.6	5.9	4.6	4.9	3.8	7.7	6.2	6.2	4.6	5.3	20.8	41.8	96.1	156.2	6.1	13.2	213.8	148.1	14.4	7.8	38.4	40.7	108.5	112.4	120.1	180.1	302.2	318.8	471.6	257.3	1352.9	889.4	259.7	270.3	8.3	9.8	4.3	5.1	4.6	4.2	5.5	7.3	4.2	9.6	6
PKIA	25.9	28.6	19	19.8	26.8	21.2	21	22.5	283.6	773.9	28.7	34.8	31.3	19.3	16.5	21.4	18	32.4	17.9	21.7	26.2	24.3	8.8	8	67.3	43.6	13.2	17.4	46.4	31.9	50.2	26	9	9.9	22.5	18.6	20.1	18.8	74.8	55.7	158	202.7	126.7	62.9	83.5	122.9	17.5	28.1	141.6
PLAU	6	5.9	6.3	5.6	5.6	4.3	4	4.3	3	6.6	4.4	5.2	3.3	3.8	7.3	5.4	3.9	5.4	584.6	651.6	5.1	4.3	5.1	4.9	4.8	5.4	5.9	6	5.9	6.3	4.8	5.8	5.9	5.4	4.8	4.1	4.8	4.6	8	7.7	3.9	4.6	4.1	3.6	4.6	6.3	12.7	3.7	6.3
PLCG1	15.6	10.4	6.4	3.6	7.4	5.4	5	5.3	5.7	6.7	5.6	5.7	4.2	4.9	6.8	6.2	4.9	7	4.8	4.7	5.2	5.5	4.9	4.9	6.4	7	7.8	4.9	5.9	6.1	65.9	99	14.2	15.7	6.1	5.3	88.5	54.9	5	8.7	5.1	6	7.6	8.2	7.3	13.6	3.2	3	12.2
POLA1	117.8	95.8	5.7	5.1	6.6	5	4.5	4.7	3.8	7.6	5.3	6.1	4	5	6.9	6.2	4.4	6.6	5.1	5.6	98.8	28	5.8	5.8	5.5	5.9	7.1	7	51.6	43.3	5.5	6.4	7.9	6.4	18.9	23	5.3	5.3	5.7	8.7	4.5	5.3	4.7	4.1	5.3	7.1	4	4.1	6.5
POLB	57	84.7	9.4	15.7	32.2	18.7	29.5	17.1	27.6	38.3	22	24.9	9.4	16.9	328.9	255.7	18.6	25.7	61.1	27.7	30.7	18.4	96.7	49	43.8	51.4	70.1	87.1	95.3	87.1	32.4	30.2	78	59.5	18.1	14.1	43.1	33.2	20.3	73.1	26.5	24.2	345.6	318.5	227.4	243.6	12.7	15.5	24.6
POLG	146.4	135.6	109.7	93.7	140.4	42.6	111.9	110.9	51.5	129.7	60	148.5	68.6	53.2	180.7	178.1	84.8	114.7	108.7	122.2	103	111.7	135.7	121.7	148.7	128.7	136.8	138.6	146.2	151.5	194.5	166.4	181.1	188.5	81.4	69.4	181.7	201	111.6	267.6	88.8	108.9	108.8	77	101.3	114.4	70.8	63.3	116.8
PON1	7.7	8.6	7.9	6.7	9.7	8.9	6.7	7	4.9	10.3	10.2	10.8	6.1	7.3	7	7.8	6.4	9.6	6.8	7.2	8.4	6.5	8	7.6	7.1	8.1	9.2	8.6	8.3	9.6	7.3	8.3	8.3	8	7.9	6.5	6.7	6.8	7.9	14.5	6.3	7.3	6.6	5.8	7.8	10.2	5.5	6.5	9.1
PPARD	27.9	26.4	21.9	20.1	25.3	19.6	19.5	21.3	15.7	29.7	7.7	22.5	15.3	34.4	16	18.2	17	24.1	20.2	22.2	16.9	22.1	22.6	22.7	21.9	31.7	27.6	14.7	19.9	11.4	21.9	25.4	19.2	25.1	21	18.4	21.3	20.9	22.3	33.1	17.5	20.5	18.6	20.1	20.4	29.4	14.9	34.7	32.7
PPARG	5.5	5.2	194	240.2	5	4.3	3.5	3.7	2.9	5.8	3.9	4.6	3.1	3.5	4.3	4.7	3.4	5	4	4.3	4.7	3.8	4.5	4.4	4.1	4.7	5.4	5.3	5	5.5	4.1	4.9	5.1	4.8	4.2	3.6	4	4	4.4	6.1	3.4	4	3.6	3.2	4.2	5.4	3	3.3	4.9
PRKACA	104.6	82.3	194.3	121.3	375.4	166.5	334.8	308.1	112.7	147	38.8	100.3	33.6	43.4	50.1	113.2	108.2	105.8	50.1	72.8	66.4	99.1	178.8	369	42.7	88.3	376.8	150.2	99.7	60.4	81.2	75	103	182.1	44.7	48.8	80.9	81	124.5	64.7	101.9	82.1	195.9	124.4	141.7	172.4	28.3	32	212.9
PRKCA	6.4	6.4	5.6	5	6.8	5.1	4.5	4.8	3.6	7.3	4.8	6.6	3.9	4.6	5.2	5.6	4.4	6.6	5	5.3	5.9	4.7	5.8	5.7	5.1	5.9	6.7	6.8	6.2	6.8	5	5.9	6.2	5.7	5.5	4.6	5	5	5.6	8.9	4.4	5.2	4.6	4.1	5.3	7	3.6	4.2	6.3
PRKCG	4.4	4.4	3.6	3.3	4.1	3.5	2.9	3.1	2.6	4.9	3.3	3.8	2.7	2.8	3.7	4	2.9	4	3.3	3.6	3.9	3.2	3.7	3.7	3.5	4	4.5	4.5	4.4	4.6	3.6	4.1	4.3	4.2	3.5	3	3.4	3.4	3.7	5.1	2.9	3.4	3	2.6	3.4	4.5	2.4	3.5	4.1
PRSS1	14	15.1	13.6	9	13.9	13.7	9.7	10.3	8.5	16.7	14.4	14.7	8.2	9.6	8.6	9.8	144.8	138.6	9.8	10.1	13.4	10.7	12.8	12.6	10	13.6	15.4	15.3	14.6	15.7	9.9	14.1	14.9	13.9	11.9	10.3	11.7	9.6	12.6	25.3	9.8	17	10.2	8.9	11.6	15.3	11.1	11.4	14.1
PTGER3	8.9	9.5	10.6	10	15.8	10.2	9.3	9.3	6.7	14	16.1	23.5	12	14.8	7.8	9.4	9.3	15.4	9	10	10.2	8.3	10.6	10.3	8.8	11	12.3	10.9	10.4	11.9	8.2	9.6	10.1	9.3	10.4	8.8	7.8	7.7	10.7	18.4	8.4	9.7	12	7.7	10.7	13.6	10.6	11.7	13.8
PTGES	8.4	9	9.9	9	11	9.1	7.8	8.2	5.6	13.2	10.1	10.4	16	11.4	7.3	9.2	7.7	11.4	9.1	9.9	10.7	8.7	10	10.1	5.5	10.7	12.4	9.6	10.5	12.6	7.4	11	10.8	11.2	9.7	9	8.5	7.2	10.1	13.6	9.2	9.3	8.3	7.2	9.5	12.7	6.5	7.5	12.2
PTGS1	4.3	4.3	3.7	4	4	3.1	2.8	2.9	2.4	4.7	3.1	3.7	2.5	2.8	4	5.3	2.7	3.9	3.2	3.5	4	3.1	3.7	3.7	3.4	3.9	4.4	4.6	6.9	5.9	3.4	4	4.3	4	3.7	4.2	3.3	3.3	58	5.1	2.8	3.3	2.9	2.5	3.3	4.4	2.2	2.5	4
PTGS2	6.7	8.1	7.4	5.9	9.6	11.2	6	6.4	4.5	9.3	8.8	12.1	6.8	8.9	37	42.2	6	9.2	734.4	584.2	8	6	90.7	118.1	6.7	7.5	204.1	169.8	17	22.2	5.9	7.8	8.2	7.6	7.5	6.1	5.9	6.4	25.2	17.6	5.9	6.8	6.2	5.6	7	9.9	8.2	8.3	8.6
PTPN1	86.1	43.3	3.9	3.5	4.3	3.5	3.1	3.2	2.7	5.2	3.4	4.1	2.5	3.2	138.1	95.3	3	4.3	3.6	7.5	4.2	3.4	10.2	17	227.8	144.9	35.8	6.1	18.3	7.7	29.5	6.3	69.4	47.5	3.7	3.2	49	23.4	4	5.2	3	3.7	3.3	2.8	3.6	4.8	2.4	2.7	4.2
PTPN2	10.1	10.9	11.3	8.7	19.3	17.4	9.7	10.9	5.8	13	13.9	18.9	18.1	17.7	8.5	10.2	9.8	17	9.7	9.6	11.5	9.3	13.7	10.8	9.7	11.6	13	21.1	10.2	13	8.8	11.7	12.2	10.2	11.7	9.5	8.8	9.5	13.8	40	9.3	10.2	9.3	8.4	12	17.5	11.2	17.1	14.4
PTPN6	830.7	584.3	33.7	10.9	47.1	34.8	22.5	26.4	8.6	35.2	23.5	74.7	27.7	16	781.5	748.8	172	223	41.1	28.1	53.6	83.2	1366.9	1266.1	1377.9	1331.5	1025	1279.9	358.2	348.3	750.3	1033	1382.8	972.9	26.8	22.1	883.5	776.3	18.3	53	20.3	16.8	15.2	19.5	21.9	38.7	17.9	31.1	21.1
PYGM	4.9	4.8	4.1	3.7	4.6	3.6	3.2	3.4	3	5.5	3.7	4.4	2.9	3.2	4.3	4.5	3.2	4.6	3.7	4	4.4	3.5	4.2	4.1	3.9	4.5	5	5	4.7	5.2	3.9	4.5	4.8	4.5	3.9	3.4	3.9	3.7	4.2	5.9	3.3	3.9	4.7	3	3.9	5.1	2.7	3	4.7
RELA	103.7	96.1	47.6	46.2	48.3	50.5	57.5	63.9	30.2	60.6	46.4	63.2	33.9	33.2	116.2	170	41.2	62.2	61.6	96.3	54.8	47.2	158.6	119.6	101.5	115.9	141.2	244.6	47.6	64.8	107.9	202.1	243.8	189.7	47.8	35.3	105.6	85.5	82.6	74.5	36.4	40	48.6	37.5	39.5	55.5	25.3	24.7	33.7
RXRA	30.7	36.6	9.1	7.3	9.6	9.8	7	7.5	6.4	11.1	7.7	9.6	7.8	7.7	9.6	10.2	17.1	17.6	8.3	9.1	13.6	12.8	124.5	89.3	7.4	7.7	11.4	27.5	11.5	11.6	8.9	9.8	11	22.6	208.2	139.3	6.5	7.5	7.5	12.4	7.2	8.5	7.6	6.5	8.3	11.2	5.8	6.9	10.4
SCN5A	6.1	6.1	5	4.4	5.9	4.7	4	4.1	3.2	6.6	4.3	5.2	3.6	4.2	4.8	5.6	3.9	5.8	4.5	4.8	5.2	4.3	5.1	5.1	4.9	5.4	6.2	6.2	6	6.4	4.9	6.6	5.6	5.6	4.8	4.1	4.6	4.7	5.1	8.3	3.9	4.6	4.1	3.6	4.6	6.1	3.3	3.9	5.5
SELE	8.2	8.6	8.7	7	12.3	10.7	7.4	8.3	4.8	10.8	10.3	13	8.5	10.6	7.8	7.9	7.2	12	7.4	8	8.8	7.1	9.7	8.6	7.8	8.9	10.4	9.9	9.1	10.6	7.2	8.4	9.6	8.3	8.8	7.2	7.5	7.5	9	25.3	7.1	8	7.4	6.5	9.1	12	7.7	12.6	10.5
SLC28A3	4.4	4.4	3.7	3.3	4.1	3.2	2.9	3	2.5	4.9	3.8	4.1	2.5	2.9	3.8	4	2.8	4.2	3.3	3.6	3.9	3.2	3.7	3.7	3.5	4	4.6	4.5	4.3	4.7	3.5	4.1	4.4	4.1	3.5	3	3.4	3.4	3.7	5.3	2.9	3.4	3	2.6	3.4	4.5	3.2	2.6	4.5
SLC37A4	26.8	18.6	3.8	3.4	4.8	3.5	3.7	3.8	3.2	5.4	3.3	4.1	3.1	3	4	4.2	10.8	6.7	4	4.4	98.7	82.2	4.6	4.5	3.7	5.2	4.7	4.6	17.4	23.3	6.7	8	8.5	4.9	79.1	93.4	15.3	8	3.9	5.4	3.1	4.2	3.7	2.9	4.3	5.7	2.4	3.4	4.6
SLC5A1	4.4	4.4	3.7	3.3	4.1	3.2	2.9	3.1	2.5	4.9	3.8	9.3	2.5	3	3.8	4	2.8	4.1	3.3	3.6	4	3.2	3.8	3.8	3.6	4	4.6	4.5	4.5	4.7	3.5	4.2	4.4	4.1	3.6	3.1	3.4	3.4	3.7	5.6	2.9	3.4	3	2.7	3.4	4.6	2.4	2.8	4.1
SLC5A2	5.8	5.5	4.9	4.4	5.6	4.4	3.9	4	3.3	6.5	4.2	5.3	3.5	4	4.8	5.1	3.8	11.7	4.4	4.9	5.1	4	4.9	4.7	4.5	5.1	5.7	5.7	5.4	5.9	4.5	5.8	5.7	5.1	8.8	4	4.3	4.5	6.8	7.5	3.8	4.5	4	3.5	4.6	6	4.3	3.4	5.4
SLC5A4	4.3	4.3	3.6	3.2	4	3.1	2.8	3	2.4	4.8	3.1	3.8	2.4	2.8	3.7	3.9	2.8	4	3.2	3.5	3.9	3.1	3.7	3.7	3.5	3.9	4.4	4.5	4.2	4.6	3.4	4	4.3	4.1	3.5	3	3.3	3.3	3.6	5.2	2.8	3.3	3	2.6	3.3	4.4	2.2	2.6	4
SLC6A2	4.8	4.8	4	3.6	4.6	3.6	3.1	3.3	2.7	5.3	3.5	4.3	2.8	3.2	4.1	4.3	3.1	4.5	3.6	3.9	4.3	3.5	4.1	4.1	3.8	4.3	4.9	4.9	4.6	5.1	3.8	4.5	4.8	4.4	3.9	3.3	3.7	3.7	4	6	3.2	3.7	3.3	2.9	3.8	5.3	2.5	2.9	4.5
SLC6A3	4.8	4.6	5	3.5	4.8	3.5	3	3.2	2.6	5.2	3.5	4.1	2.7	3.7	4	4.2	3	4.2	3.5	3.8	4.2	3.3	4	4	3.7	4.2	4.8	4.8	4.7	4.9	3.7	4.4	4.6	4.3	3.7	3.2	3.6	3.6	3.9	5.2	3.1	3.6	3.2	2.8	3.6	5.7	3.3	6.5	4.5
SLC6A4	5.7	5.7	5.1	4.6	5.9	4.6	4.1	4.3	3.6	6.8	4.5	5.7	3.4	4.1	4.8	5.1	6.6	5.8	4.6	5	5.3	4.4	5.2	5	4.9	5.5	6.3	6.2	6	6.5	4.9	5.8	6	5.6	5	4.3	4.5	4.5	5.1	7.1	4.1	7	9.5	10.2	4.8	6.4	3.3	3.8	5.8
SLCO1B1	11.4	10.1	13.8	12.1	23.6	14	11.9	13.7	8.6	17.7	18.7	20.6	12.7	14.2	8.7	11.5	12.7	16.3	11.3	13.4	14.3	11.6	14	13.6	11.9	14.4	16.4	14	15.2	17	9.2	14.6	14.1	11.6	13.4	11.3	11.2	10.1	16.2	54.3	13.7	12.3	11.4	9.9	14.5	29	13.7	11.3	17.8
STAT3	246.4	203.3	307.2	384.2	80.1	80.5	123.6	129.5	66.2	78	62.5	46	66.1	52.3	213.5	187	172.7	232.8	61.9	136.4	33.1	29.6	179	235.9	153.5	149.8	254.9	395.2	167.9	234.4	231.8	310.4	386.1	245.1	28.9	23.9	221.5	205.3	187.4	85.3	23.3	50.1	64.7	59.5	84.2	86.4	86.6	37.7	40.7
TGFB1	7.7	7.4	6.7	6	9.1	6.7	5.4	6.1	3.9	8.4	6.1	6.9	13.3	21.5	5.8	7	5.4	8.8	5.8	6.4	6.9	5.7	6.8	6.4	6.1	9.2	7.9	7.7	7.2	8.4	6.1	7.5	7.4	6.9	8.7	7.1	6.1	6.1	6.7	10.8	5.4	6.2	5.6	4.9	6.4	8.6	4.6	6.9	8
TNF	28.1	78.9	3.3	2.9	3.7	2.8	2.6	2.7	2.2	4.3	3	3.4	2.5	3	38.3	42.4	2.5	3.6	2.9	3.2	3.5	2.8	3.4	3.4	3.2	3.6	20.3	25	3.9	4	3.2	4.4	4.7	3.6	3.1	2.7	3.1	3.1	3.3	4.4	2.6	3	2.7	2.3	3	4	2	2.7	3.6
TOP2A	1262.1	1063.6	9.6	7	13.4	13.7	8.2	8.3	5.2	11.7	9.8	17.9	9.2	10.7	19.7	18.8	8.4	15.4	66.7	52.7	1152.9	1232.9	11.8	9.5	8.5	10.1	31.6	199.9	818	758.4	8.3	9.7	11.8	9.7	955.8	788.4	7.5	7.7	333.4	227	7.5	8.7	7.6	6.8	9.8	12.4	6.7	12.6	11.7
TP53	353.3	211.5	11	17.2	7.5	5.3	4.9	5.2	3.7	7.9	5.2	6.4	4.2	4.9	17.3	39.5	4.9	7	6.5	25.7	67.5	74.1	27.3	69.5	83.4	47.1	23.5	11.2	42.6	62.3	19	13.5	56.1	19.4	14	10.8	19	29.1	100.7	11.1	4.5	5.5	4.9	4.3	5.7	7.5	3.9	4.5	6.8
TPH1	7.1	6.9	6.5	5.5	8	6.5	5.3	5.6	4	8.4	6	7.9	8.1	6.9	5.8	6.5	5.2	7.9	5.7	6.1	6.8	5.6	6.7	6.4	5.9	6.9	7.7	7.8	6.9	8.1	5.7	6.9	7.2	6.7	6.4	5.3	5.5	5.7	6.6	12.4	5.2	5.9	5.3	4.7	6.2	8.4	4.9	6.2	7.5
TYR	7.3	7	6.4	5.5	7.7	6.2	5	5.3	4.1	8.5	5.8	8.7	4.8	5.2	4.2	6.4	5.1	7.3	5.8	6	6.2	3.4	6.4	4	3.7	6.3	7.6	4.7	4.5	5	3.7	6.6	6.9	6.4	5.5	4.8	4	3.6	6.4	8.5	5.1	5.9	5.3	4.6	6.1	8	4.3	5.2	9.3
TYRP1	5.2	5.3	4.5	4	5.4	4.2	3.6	3.9	3	6	4	7.1	3.2	3.8	4.4	4.7	3.6	5.2	4.1	4.4	4.8	3.9	4.6	4.5	4.3	4.8	5.5	5.4	5.1	5.7	4.3	5	5.2	4.8	4.4	3.8	4.1	4.1	4.6	8.7	3.6	4.2	3.8	3.3	4.3	5.7	3	3.4	5.2
VEGFA	243.6	197.6	11.1	8.8	150.7	125.3	118.2	154.8	28.6	68.3	16.4	31.7	8.6	15.6	12.2	13.6	29.9	41.5	210.6	333.8	107	88.5	41.6	26.5	4.3	5.4	141	144.7	13.7	26.9	4.3	5.1	5.5	4.9	135.5	131.8	4.2	4.2	50.4	22.3	20.3	13.9	37.7	38	11.2	10.5	34.7	37.8	13.1
XDH	7.8	19.5	16.2	14.6	18	13.7	19.2	19	13.9	21.7	20.4	18.9	12.7	13.6	6.8	7.5	22.4	38.8	14.7	16.1	8.2	4.1	10	9	7.9	9.1	11.8	8	7.8	5.5	7.3	5.1	11.3	7.2	12.5	10.8	6.1	14.9	16.4	23.3	25.2	27.8	33.8	33.8	22.3	19.9	10	9.3	18
[truncated: 128 more columns]
